# Supplementary material for: Plant-Derived Oleanolic Acid (OA) Ameliorates Risk Factors of Cardiovascular Diseases in a Diet-Induced Pre-Diabetic Rat Model: Effects on Selected Cardiovascular Risk Factors
Source: PubMed Central journal article supplement (PMC6359497; doi:10.3390/molecules24020340), 2019-01-18
Supplement: molecules-24-00340-s001.pdf [file molecules-24-00340-s001.pdf]

# **Plant-Derived Oleanolic Acid (OA) Ameliorates Risk Factors of Cardiovascular Diseases in a Diet-Induced Pre-Diabetic Rat Model: Effects on Selected Cardiovascular Risk Factors**

**Mlindeli Gamede, Lindokuhle Mabuza, Phikelelani Ngubane and Andile Khathi \***

Department of Human Physiology, School of Laboratory Medicine and Medical Sciences, College of Health Sciences, University of KwaZulu-Natal, X54001 Durban, South Africa; 213571877@stu.ukzn.ac.za (M.G.); 211509843@stu.ukzn.ac.za (L.M.); Ngubanep1@ukzn.ac.za (P.N.)

\* Correspondence: khathia@ukzn.ac.za; Tel.: +27-0312-607-585

**Table S1:** Composition of the high fat high carbohydrate (HFHC) diet

| <b>Ingredient</b>          | <b>Incl(%)</b> | <b>Mix(kg)</b> |
|----------------------------|----------------|----------------|
| Maize                      | 38.98          | 390.000        |
| Palm Oil                   | 20.99          | 210.000        |
| Soya Full Fat              | 14.99          | 150.000        |
| Wheat Gluten               | 6.50           | 65.000         |
| Flour                      | 6.00           | 60.000         |
| Monodex                    | 5.00           | 50.000         |
| Sugar - White              | 5.00           | 50.000         |
| Limestone                  | 1.00           | 10.000         |
| Dicalcium Phosphate        | 0.50           | 5.000          |
| Vitamin Premix             | 0.35           | 3.500          |
| Salt - Fine                | 0.30           | 3.000          |
| Amino Acid - DL Methionine | 0.30           | 3.000          |
| Mineral Premix             | 0.10           | 1.000          |
|                            | <b>100.01</b>  | <b>1000.50</b> |

**Table S2:** Nutritional value of the high fat high carbohydrate (HFHC) diet

| <b>Nutrient</b>      | <b>Units</b> | <b>Actual</b> |
|----------------------|--------------|---------------|
| Dry Matter           | g/kg         | 919.93        |
| Metabolizable Energy | MJ/kg        | 15.86         |
| Crude Protein        | g/kg         | 151.27        |
| AShreonine           | g/kg         | 4.51          |
| ASIsoluecine         | g/kg         | 5.24          |
| ASLysine             | g/kg         | 6.54          |
| ASMethionine         | g/kg         | 4.86          |
| ASryptophan          | g/kg         | 1.30          |
| ASstidine            | g/kg         | 3.30          |
| ASTSAA               | g/kg         | 6.79          |
| ASValine             | g/kg         | 5.80          |
| Fat                  | g/kg         | 250.46        |
| Carbohydrate         | g/kg         | 427.29        |
| Fibre                | g/kg         | 22.08         |
| Ash                  | g/kg         | 26.31         |
| Avl Phosphorus       | g/kg         | 1.66          |
| Calcium              | g/kg         | 5.47          |
| Total Phosphorus     | g/kg         | 3.60          |

**Table S3:** Composition of fats, proteins and carbohydrates of the normal diet (ND) and high fat high carbohydrate diet (HFHC)

|             | <b>Fats (%)</b> | <b>Proteins (%)</b> | <b>Carbohydrates (%)</b> |
|-------------|-----------------|---------------------|--------------------------|
| <b>ND</b>   | 15              | 30                  | 55                       |
| <b>HFHC</b> | 25              | 15                  | 60                       |
